# Supplementary material
Source: PubMed Central journal article supplement (PMC518800)

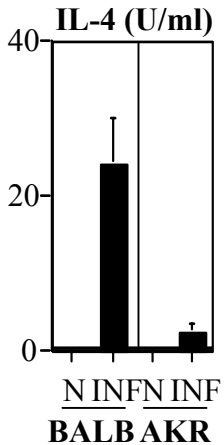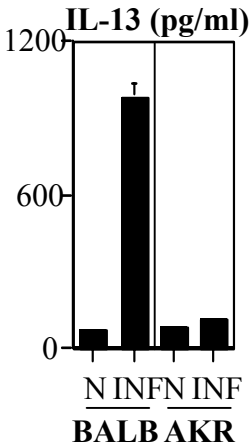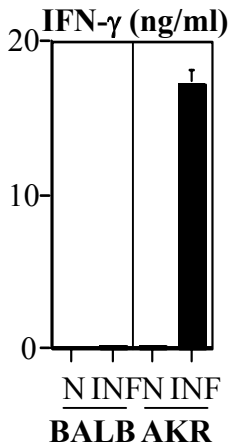

Supplement: pnas_101_37_13596__1.pdf [file pnas_101_37_13596__1.pdf]
